# Supplementary material for: Disability and ageing in China and India – decomposing the effects of gender and residence. Results from the WHO study on global AGEing and adult health (SAGE)
Source: Springer Nature journal article supplement (doi:10.1186/s12877-017-0589-y), 2017-08-31
Supplement: MOESM1 [file 14960300]

# Appendix B

## Section 2000: Health State Descriptions

Time Begin   :

Now we will switch to questions specifically about your health. The first questions are about your overall health, including both your physical and your mental health. By difficulty in the second question, I mean requiring increased effort, discomfort or pain, slowness or changes in the way you do the activity.

|       |                                                                                                          |                                                                   |
|-------|----------------------------------------------------------------------------------------------------------|-------------------------------------------------------------------|
| Q2000 | In general, how would you <u>rate your health today</u> ?                                                | 1 Very good<br>2 Good<br>3 Moderate<br>4 Bad<br>5 Very bad        |
| Q2001 | Overall in the last 30 days, how much difficulty did you have with <u>work or household activities</u> ? | 1 None<br>2 Mild<br>3 Moderate<br>4 Severe<br>5 Extreme/cannot do |

Now I would like to review the different functions of your body. When answering these questions, I would like you to think about the last 30 days, taking both good and bad days into account. When I ask about difficulty, I would like you to consider how much difficulty you have had, on average, in the last 30 days, while doing the activity in the way that you usually do it. Let me remind you, by difficulty I mean requiring increased effort, discomfort or pain, slowness or changes in the way you do the activity.

*INTERVIEWER: Read and show scale to respondent.*

### MOBILITY

|                                                                                                                                                    | NONE | MILD | MODERATE | SEVERE | EXTREME /<br>CANNOT DO |
|----------------------------------------------------------------------------------------------------------------------------------------------------|------|------|----------|--------|------------------------|
| Q2002 Overall in the last 30 days, how much difficulty did you have ... with <u>moving around</u> ?                                                | 1    | 2    | 3        | 4      | 5                      |
| Q2003 ... in <u>vigorous activities</u> ('vigorous activities' require hard physical effort and cause large increases in breathing or heart rate)? | 1    | 2    | 3        | 4      | 5                      |

*INTERVIEWER: Use Showcard if needed for mobility.*

### SELF-CARE

|                                                                                                                                               | NONE | MILD | MODERATE | SEVERE | EXTREME /<br>CANNOT DO |
|-----------------------------------------------------------------------------------------------------------------------------------------------|------|------|----------|--------|------------------------|
| Q2004 Overall in the last 30 days, how much difficulty did you have ... with <u>self-care</u> , such as bathing/washing or dressing yourself? | 1    | 2    | 3        | 4      | 5                      |
| Q2005 ... in <u>taking care of and maintaining your general appearance</u> (for example, grooming, looking neat and tidy)?                    | 1    | 2    | 3        | 4      | 5                      |
| Q2006 ... in <u>staying by yourself</u> for a few days (3 to 7 days)?                                                                         | 1    | 2    | 3        | 4      | 5                      |

WHO Study on Global Ageing and Adult Health (SAGE)  
INDIVIDUAL Questionnaire A

**PAIN AND DISCOMFORT**

|       | Overall in the last 30 days,...                                                              | NONE  | MILD | MODERATE | SEVERE | EXTREME /<br>CANNOT<br>DO |
|-------|----------------------------------------------------------------------------------------------|-------|------|----------|--------|---------------------------|
| Q2007 | ...how much of <u>bodily aches or pains</u> did you have?                                    | 1     | 2    | 3        | 4      | 5                         |
| Q2008 | ...how much <u>bodily discomfort</u> did you have?                                           | 1     | 2    | 3        | 4      | 5                         |
|       | <i>If Q2007 and Q2008 are both = 1, "None".....→</i>                                         | Q2010 |      |          |        |                           |
| Q2009 | ... how much <u>difficulty</u> did you have in your daily life because of your <u>pain</u> ? | 1     | 2    | 3        | 4      | 5                         |

**COGNITION**

|       | Overall in the last 30 days, how much difficulty...                                                                                           | NONE | MILD | MODERATE | SEVERE | EXTREME /<br>CANNOT<br>DO |
|-------|-----------------------------------------------------------------------------------------------------------------------------------------------|------|------|----------|--------|---------------------------|
| Q2010 | ... did you have with <u>concentrating or remembering things</u> ?                                                                            | 1    | 2    | 3        | 4      | 5                         |
| Q2011 | ... did you have in <u>learning a new task</u> (for example, learning how to get to a new place, learning a new game, learning a new recipe)? | 1    | 2    | 3        | 4      | 5                         |

**INTERPERSONAL ACTIVITIES**

|       | Overall in the last 30 days, how much difficulty did you have,...           | NONE | MILD | MODERATE | SEVERE | EXTREME /<br>CANNOT<br>DO |
|-------|-----------------------------------------------------------------------------|------|------|----------|--------|---------------------------|
| Q2012 | ... with <u>personal relationships or participation in the community</u> ?  | 1    | 2    | 3        | 4      | 5                         |
| Q2013 | ... in <u>dealing with conflicts and tensions</u> with others?              | 1    | 2    | 3        | 4      | 5                         |
| Q2014 | ... with <u>making new friendships or maintaining current friendships</u> ? | 1    | 2    | 3        | 4      | 5                         |
| Q2015 | ...with <u>dealing with strangers</u> ?                                     | 1    | 2    | 3        | 4      | 5                         |

**SLEEP AND ENERGY**

|       | Overall in the last 30 days, how much of a problem did you...                                                                              | NONE | MILD | MODERATE | SEVERE | EXTREME /<br>CANNOT<br>DO |
|-------|--------------------------------------------------------------------------------------------------------------------------------------------|------|------|----------|--------|---------------------------|
| Q2016 | ... have with sleeping, such as <u>falling asleep, waking up frequently during the night</u> or <u>waking up too early</u> in the morning? | 1    | 2    | 3        | 4      | 5                         |
| Q2017 | ... have due to <u>not feeling rested and refreshed</u> during the day (for example, feeling tired, not having energy)?                    | 1    | 2    | 3        | 4      | 5                         |

**AFFECT**

|       | Overall in the last 30 days, how much of a problem did you have... | NONE | MILD | MODERATE | SEVERE | EXTREME /<br>CANNOT<br>DO |
|-------|--------------------------------------------------------------------|------|------|----------|--------|---------------------------|
| Q2018 | ...with <u>feeling sad, low or depressed</u> ?                     | 1    | 2    | 3        | 4      | 5                         |
| Q2019 | ... with <u>worry or anxiety</u> ?                                 | 1    | 2    | 3        | 4      | 5                         |

WHO Study on Global Ageing and Adult Health (SAGE)  
INDIVIDUAL Questionnaire A

**VISION** (*Respondent should answer, as when wearing glasses/contact lenses if used*)

|       |                                                                                                                                                                             |                                                                                  |
|-------|-----------------------------------------------------------------------------------------------------------------------------------------------------------------------------|----------------------------------------------------------------------------------|
| Q2020 | When was the last time you had your <u>eyes</u> examined by a medical professional?<br><i>INTERVIEWER: ENTER YEARS AGO. ENTER "00" IF LESS THAN 1 YEAR.</i>                 | <input type="text"/> <input type="text"/> YEARS AGO<br>-8 DON'T KNOW<br>98 NEVER |
| Q2021 | Do you use eyeglasses or contact lenses to see <u>far away</u> (for example, across the street)?                                                                            | 1 YES<br>2 NO                                                                    |
| Q2022 | Do you use eyeglasses or contact lenses to see <u>up close</u> (for example at arms length, like when you are reading)?                                                     | 1 YES<br>2 NO                                                                    |
| Q2023 | In the last 30 days, how much difficulty did you have in seeing and recognising an object or a person you know <u>across the road</u> (from a distance of about 20 meters)? | 1 NONE<br>2 MILD<br>3 MODERATE<br>4 SEVERE<br>5 EXTREME / CANNOT DO              |
| Q2024 | In the last 30 days, how much difficulty did you have in seeing and recognising <u>an object at arm's length</u> (for example, reading)?                                    | 1 NONE<br>2 MILD<br>3 MODERATE<br>4 SEVERE<br>5 EXTREME / CANNOT DO              |

**FUNCTIONING ASSESSMENT**

These next questions ask about difficulties due to health conditions. Health conditions include diseases or illnesses, other health problems that may be short or long lasting, injuries, mental or emotional problems, and problems with alcohol or drugs.

Think back over the last 30 days and answer these questions thinking about how much difficulty you had doing the following activities. Some of these questions may seem repetitive, but we do need your attention and it is important to give us answers to each question.

**INTERVIEWER:** *For each question, please circle only one response. 'N/A' means 'not applicable'.*

|       | In the last 30 days, how much difficulty did you have ...                         | None | Mild | Moderate | Severe | Extreme/<br>cannot do | N/A |
|-------|-----------------------------------------------------------------------------------|------|------|----------|--------|-----------------------|-----|
| Q2025 | ... in sitting for long periods?                                                  | 1    | 2    | 3        | 4      | 5                     | 9   |
| Q2026 | ... in walking 100 meters?                                                        | 1    | 2    | 3        | 4      | 5                     | 9   |
| Q2027 | ... in standing up from sitting down?                                             | 1    | 2    | 3        | 4      | 5                     | 9   |
| Q2028 | ... in standing for long periods?                                                 | 1    | 2    | 3        | 4      | 5                     | 9   |
| Q2029 | ... with climbing one flight of stairs without resting?                           | 1    | 2    | 3        | 4      | 5                     | 9   |
| Q2030 | ... with stooping, kneeling or crouching?                                         | 1    | 2    | 3        | 4      | 5                     | 9   |
| Q2031 | ... picking up things with your fingers (such as picking up a coin from a table)? | 1    | 2    | 3        | 4      | 5                     | 9   |
| Q2032 | ... in taking care of your household responsibilities?                            | 1    | 2    | 3        | 4      | 5                     | 9   |
